# Supplementary material for: Photocontrolled reversible supramolecular assemblies of a diblock azo-copolymer based on β-cyclodextrin–Azo host–guest inclusion complexation
Source: Royal Society of Chemistry journal article supplement (doi:10.1039/c3py21148g), 2013-01-01
Supplement: c3py21148g.pdf [file c3py21148g.pdf]

## Supporting Information

Photocontrolled reversible supramolecular assemblies of diblock azo-copolymer  
based on  $\beta$ -cyclodextrin/Azo host-guest inclusion complexation

**Shaohua Wang, Qiongxia Shen, Nawaz Mian Hasnain, Weian Zhang\***

Shanghai Key Laboratory of Functional Materials Chemistry, School of Chemistry and Molecular  
Engineering, East China University of Science and Technology, 130 Meilong Road, Shanghai  
200237, PR China

**Scheme S1. The synthetic route of 6-(4-(phenyldiazenyl) phenoxy) hexyl acrylate monomer**

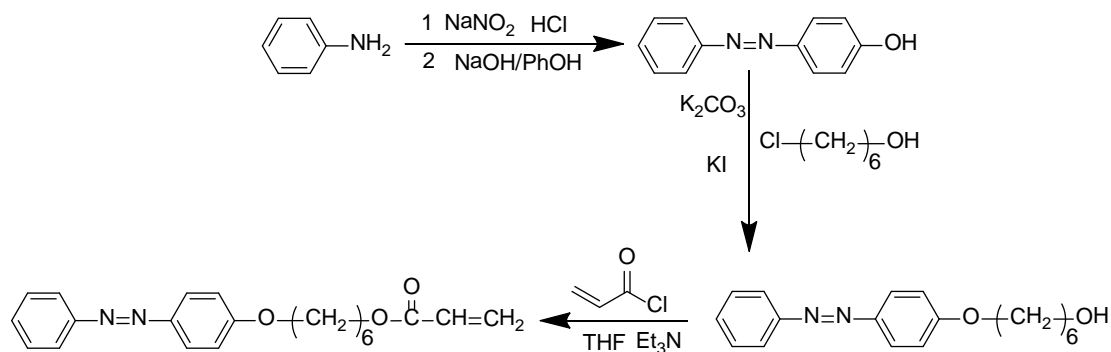

**Synthesis of 4-(phenyldiazenyl) phenol**

4-(Phenyldiazenyl) phenol was synthesized according to the literature<sup>1</sup>. <sup>1</sup>H NMR (CDCl<sub>3</sub>, 400 MHz): δ 6.94 (d, J = 8.4 Hz, 2H), 7.52-7.43 (m, 3H), 7.89-7.86 (m, 4H).

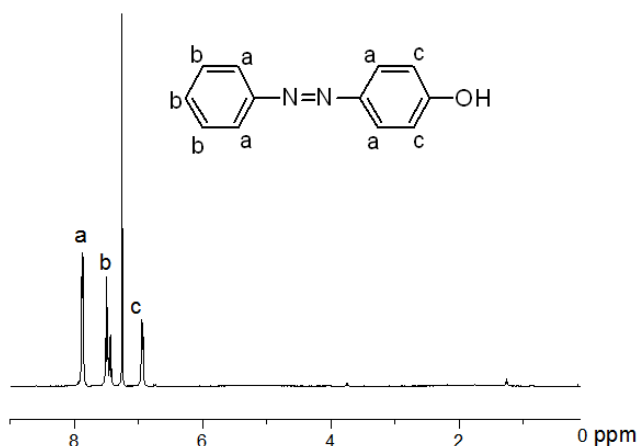

**Fig. S1.** <sup>1</sup>H NMR spectrum of 4-(phenyldiazenyl) phenol.

**Synthesis of 6-(4-(phenyldiazenyl) phenoxy) hexan-1-ol**

The 6-(4-(phenyldiazenyl) phenoxy) hexan-1-ol was prepared using the similar procedures according to the literature<sup>2</sup>. Typically, 4-(phenyldiazenyl) phenol (9.9 g, 50 mmol), 6-chloro-1-hexanol (10.2 g, 75 mmol), potassium carbonate (10.35 g, 75 mmol) and a trace amount of potassium iodide were dissolved in 200 mL DMF. The mixture solution was refluxed for 12 h and washed with a large amount of water. The product was extracted with chloroform, dried with anhydrous MgSO<sub>4</sub>. After the solvent was removed by evaporation, the crude product

was purified by recrystallization from ethanol to obtain the purified product (8.95 g, 30 mmol) in 60% yield.  $^1\text{H}$  NMR ( $\text{CDCl}_3$ , 400 MHz):  $\delta$  1.26(s, 1H), 1.54-1.44(m, 4H), 1.63(m, 2H), 1.84(m, 2H), 3.67 (q, 2H), 4.05 (t, 2H), 7.00(d, 2H), 7.52-7.43(m, 3H), 7.92-7.86(m, 4H).

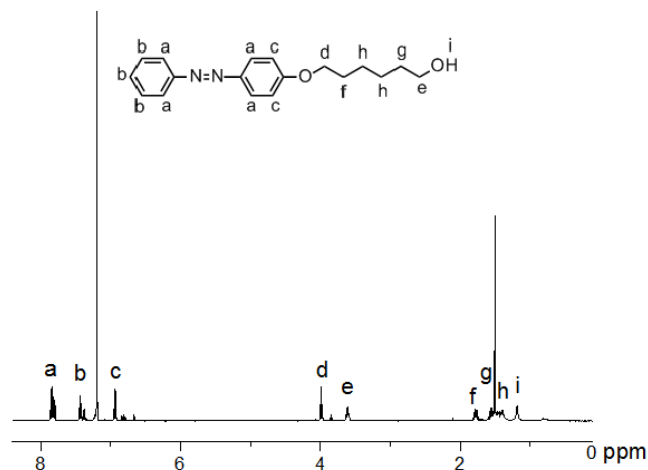

**Fig. S2.**  $^1\text{H}$  NMR spectra of 6-(4-(phenyldiazenyl) phenoxy) hexan-1-ol

### Synthesis of 6-(4-(phenyldiazenyl) phenoxy) hexyl acrylate

6-(4-(phenyldiazenyl) phenoxy) hexan-1-ol (5.96 g, 20 mmol) and triethylamine (3.04 g, 30 mmol) were dissolved in 80 mL anhydrous tetrahydrofuran. Then, acryloyl chloride (2.72 g, 30 mmol) in 10 mL anhydrous tetrahydrofuran was added dropwise to the mixed solution at 0 °C. The mixture was stirred overnight at room temperature. 200 mL deionized water was added, and the product was extracted with chloroform. After washed with deionized water three times, the product was dried with anhydrous magnesium sulfate and the solvent was removed under reduced pressure. The crude product was purified by column chromatography on silica gel (chloroform) to obtain the purified product (3.8 g, 10.8 mmol) in 54% yield.  $^1\text{H}$  NMR ( $\text{CDCl}_3$ , 400 MHz):  $\delta$  1.55-1.45(m, 4H), 1.73(m, 2H), 1.84(m, 2H), 4.05(t, 2H), 4.18(t, 2H), 5.82(d, 1H), 6.12(dd, 1H), 6.40(d, 1H), 7.00(d, 2H), 7.52-7.43(m, 3H), 7.93-7.86(m, 4H).

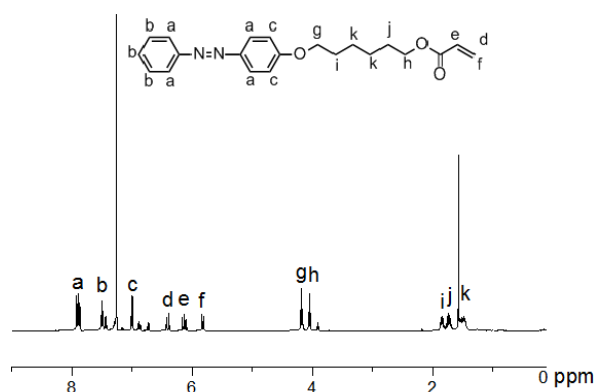

**Fig. S3.**  $^1\text{H}$  NMR spectra of 6-(4-(phenyldiazenyl) phenoxy) hexyl acrylate.

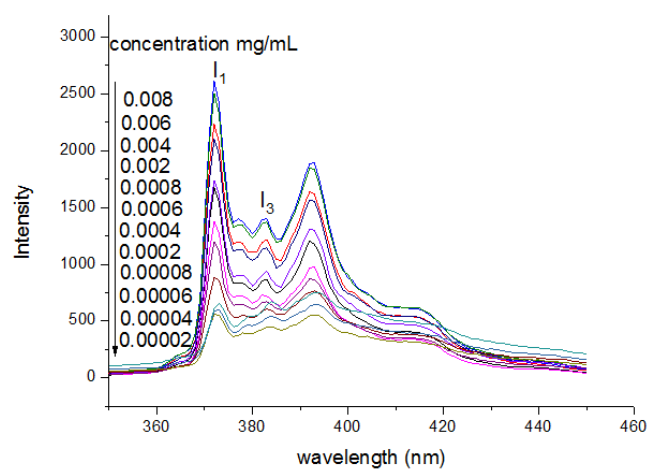

**Fig. S4.** The excitation spectra of pyrene in PAzo<sub>10</sub>-b-PS<sub>70</sub>/β-CD aqueous solution with different polymer concentration.

**Table S1.** The DLS results of PAzo<sub>10</sub>-b-PS<sub>70</sub> with β-CD micelles with different ratio of β-CD/azobenzene

| Molar ratio (cyclodextrin : Azo group) | $D_h$ [nm] | PDI ( $\mu_2/\langle\Gamma\rangle^2$ ) |
|----------------------------------------|------------|----------------------------------------|
| 0.5 : 1                                | 262 nm     | 0.199                                  |
| 1 : 1                                  | 241 nm     | 0.121                                  |
| 2 : 1                                  | 250 nm     | 0.131                                  |
| 5 : 1                                  | 244 nm     | 0.170                                  |

## References

1. B. Kiskan, F. Dogan, Y. Y. Durmaz and Y. Yagci, *Designed Monomers and Polymers*, 2008, **11**, 473-482.
2. H. Yu, T. Kobayashi and G.-H. Hu, *Polymer*, 2011, **52**, 1554-1561.
